# Supplementary material for: Effects of Exercise-Based Interventions on Functional Movement Capability in Untrained Populations: A Systematic Review and Meta-Analysis
Source: MDPI journal article supplement (doi:10.3390/ijerph19159353), 2022-07-30
Supplement: s1 [file s1]

**Table S1: Search history.**

| Databases | Search history                                                                                                                                                                                                                                                                                                                                                                                                                                                                                                                                                                 |
|-----------|--------------------------------------------------------------------------------------------------------------------------------------------------------------------------------------------------------------------------------------------------------------------------------------------------------------------------------------------------------------------------------------------------------------------------------------------------------------------------------------------------------------------------------------------------------------------------------|
| PubMed    | ((functional movement screen[Title/Abstract] OR (FMS[Title/Abstract])) OR (functional movement screen*[Title/Abstract])) AND (((functional movement patterns[Title/Abstract] OR (movement quality[Title/Abstract])) OR (injury risk[Title/Abstract])) OR (injury prediction[Title/Abstract])) OR (injury prevention[Title/Abstract])) OR (injur*[Title/Abstract])) AND(((exercise[Title/Abstract] OR (physical activity[Title/Abstract])) OR (functional training[Title/Abstract])) OR (functional strength training[Title/Abstract])) OR (movement training[Title/Abstract])) |
| Embase    | #4 #1 AND #2 AND #3<br>#3 'exercise' OR 'physical activity' OR 'functional training' OR 'functional strength training' OR 'movement training':ab,ti<br>#2 'functional movement patterns' OR 'movement quality' OR 'injury risk' OR 'injury prediction' OR 'injury prevention' OR injur*:ab,ti<br>#1 'functional movement screen' OR 'FMS' OR 'functional movement screen*':ab,ti                                                                                                                                                                                               |
| Scopus    | TITLE-ABS ( "functional movement screen" OR fms OR "functional movement screen*" ) AND TITLE-ABS ( "functional movement patterns" OR "movement quality" OR "risk injury" OR "injury prediction" OR "injury prevention" OR injur* ) AND TITLE-ABS ( exercise OR "physical activity" OR "functional training" OR "functional strength training" OR "movement training" )                                                                                                                                                                                                         |
